# Supplementary material for: Highly efficient and recyclable rhodium nanoparticle catalysts for hydrogenation of quinoline and its derivatives
Source: Royal Society of Chemistry journal article supplement (doi:10.1039/c5cy00940e), 2015-01-01
Supplement: c5cy00940e1.pdf [file c5cy00940e1.pdf]

## Supporting Information

### Highly efficient and recyclable rhodium nanoparticle catalyst for hydrogenation of quinoline and its derivatives

Mingming Niu, Yanhua Wang\*, Pu Chen, Dongjie Du, Jingyang Jiang and Zilin Jin

*State Key Laboratory of Fine Chemicals, Dalian University of Technology, Dalian 116024, PR  
China*

\* Corresponding author. Tel.: +86-411-84986033; fax: +86-411-84986033; E-mail address:

yhuawang@dlut.edu.cn

#### Materials

Toluene and *n*-heptane were purchased from Kermel and purified by distillation from an appropriate drying agent under inert atmosphere. 3-Methylquinoline, 6-methylquinoline, 8-methylquinoline, 6-methoxyquinoline and PEG<sub>4000</sub> (PEG with an average molecular weight of 4000 g/mol) were supplied by Alfa Aesar. Quinoline and 2-methylquinoline were purchased from Shanghai Aladdin Reagent Co., Ltd. RhCl<sub>3</sub>·3H<sub>2</sub>O was received from Beijing Research Institute of Chemical Industry and used without further purification.

#### Analyses

Gas chromatography analyses were performed on a Tianmei 7890 GC instrument equipped with a 50 m OV-101 column (inner diameter 0.25 mm) and a FID detector (N<sub>2</sub> as a carrier gas). GC-MS measurement was performed on a HP 6890 GC/5973 MSD instrument (with a 30 m HP-5MS column, inner diameter 0.25 mm; He as a carrier gas). ICP-AES analyses of Rh were carried out on Optima 2000 DV (Perkin Elmer, USA). The transmission electron microscope (TEM) images were performed on a Tecnai G<sup>2</sup>20 Spirit

microscope at an accelerating voltage of 120 kV.

### **TEM of the Rh nanoparticle catalyst**

The size of Rh nanoparticle catalyst was characterized by TEM. The PEG<sub>4000</sub> containing the Rh nanoparticles was diluted with a mixture of ethanol and water ( $V/V = 1:1$ ). Then, a drop of the solution was placed onto a carbon-coated copper grid, which was dried at ambient temperature.

### **Mercury poisoning test experiment**

0.5 g of Hg (0) (500 equiv. of Rh) was added to the freshly prepared PEG<sub>4000</sub>-stabilized Rh nanoparticle catalyst and stirred at 80 °C for 2 h. After cooling to room temperature, the hydrogenation of quinolines was performed as described in the text under the same reaction conditions as entry 2 in Table 1.
